# Supplementary material for: A Serine/Threonine Kinase 16-Based Phospho-Proteomics Screen Identifies WD Repeat Protein-1 As A Regulator Of Constitutive Secretion
Source: PubMed Central journal article supplement (PMC6115458; doi:10.1038/s41598-018-31426-1), 2018-08-29
Supplement: 41598_2018_31426_MOESM1_ESM.pdf [file 41598_2018_31426_MOESM1_ESM.pdf]

## Supplementary Information

### **A SERINE/THREONINE KINASE 16-BASED PHOSPHO-PROTEOMICS SCREEN IDENTIFIES WD REPEAT PROTEIN-1 AS A REGULATOR OF CONSTITUTIVE SECRETION**

**Alfonso López-Coral\*, Anneliese C. Striz\* and Pamela L. Tuma**

From Department of Biology, The Catholic University of America, Washington DC, 20064

\* These authors contributed equally to the manuscript

Address correspondence to: Pamela L. Tuma, PhD, Department of Biology, The Catholic University of America, Washington, DC 20064, ph: 202-319-6681; Fax: 202-319-5721;

Email: [tuma@cua.edu](mailto:tuma@cua.edu)

**Figure S1. López-Coral, Striz and Tuma**

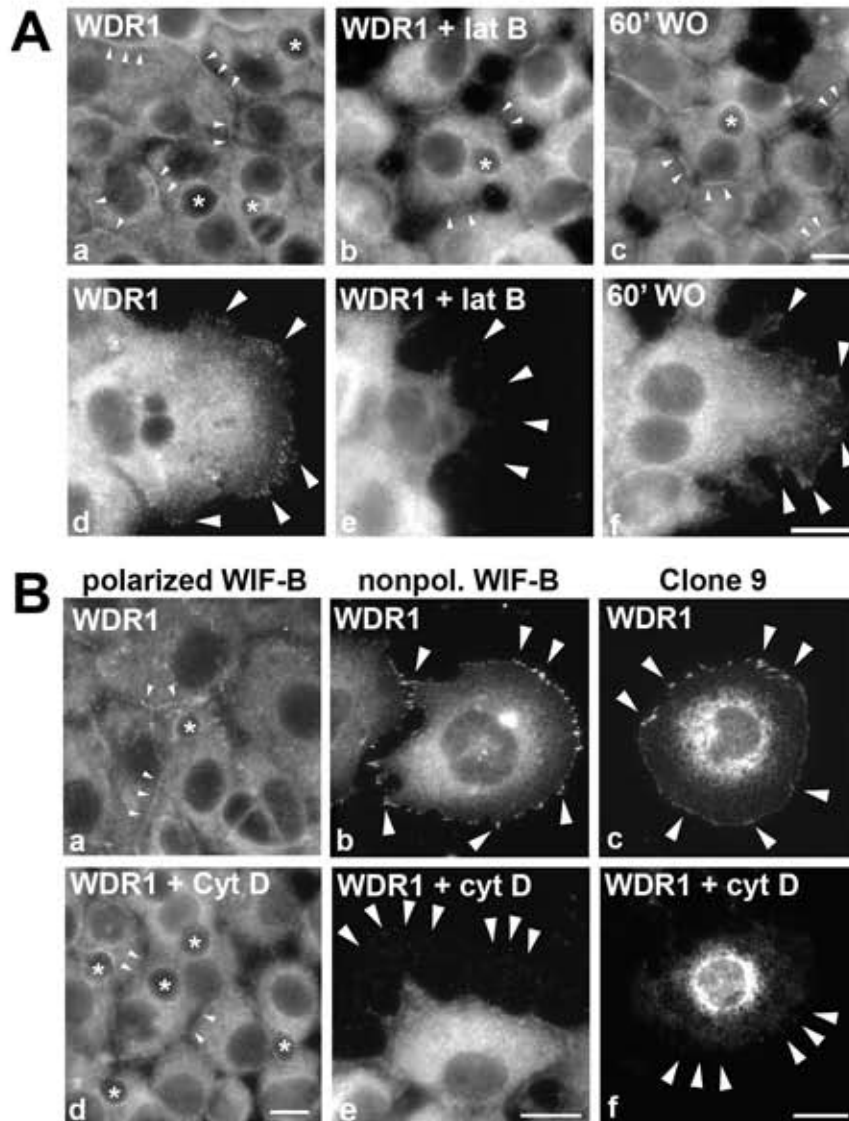

**Figure S1. A**, WIF-B cells were treated in the absence (a and d) or presence of 5  $\mu$ M latrunculin B (lat B) for 60 min (b and e). The drug was then washed out for 60 min (60' WO) (c and d). All cells were immunolabeled for WDR1. In a-c, WIF-B cells in the middle of the monolayer are shown whereas in d-f, cells at the edges of the monolayer were imaged. Arrowheads are pointing to the actin-associated WDR1 present at the basolateral cell surface (a and c) or on plasma membrane patches (d and f). In panels b and e, arrowheads are marking the cell membrane lacking WDR1 labeling. Asterisks are marking the bile canaliculi spaces. Bar = 10  $\mu$ m **B**, Polarized WIF-B cells, non-polarized (nonpol.) WIF-B cells and Clone 9 cells were treated in the absence or presence of 10  $\mu$ M cytochalasin D (cyt D) for 60 min and immunolabeled for WDR1. Arrowheads are pointing to the actin-associated WDR1 present at the basolateral cell surface (a) or on plasma membrane patches (b and c). In panels d-f, arrowheads are marking the cell periphery lacking WDR1 labeling. Asterisks are marking the bile canaliculi spaces. Bar = 10  $\mu$ m

**Table S1.** Numerous proteins display altered phosphorylation in E202A expressing cells.

| Spot | Protein                                                                                        | NCBI<br>Accession | App<br>MW | Calc<br>MW | Calc<br>PI | Peptides<br>Matched | Sequence<br>Coverage (%) | Mascot<br>Score |
|------|------------------------------------------------------------------------------------------------|-------------------|-----------|------------|------------|---------------------|--------------------------|-----------------|
| 4    | Vigilin isoform A                                                                              | GI:4885409        | 142       | 141        | 6.43       | 9                   | 8                        | 233             |
| 25   | Carbamoyl-phosphate synthase, mitochondrial                                                    | GI:8393186        | 166       | 165        | 6.33       | 4                   | 3                        | 160             |
| 52   | Carbamoyl-phosphate synthase, mitochondrial                                                    | GI:124248512      | 166       | 165        | 6.48       | 3                   | 2                        | 103             |
| 57   | Endoplasmic precursor                                                                          | GI:210032365      | 93        | 93         | 4.72       | 9                   | 10                       | 480             |
| 67   | Protein OS-9                                                                                   | GI:564359598      | 70        | N/A        | 4.75       | 4                   | 9                        | 174             |
| 73   | Carbamoyl-phosphate synthase                                                                   | GI:21361331       | 165       | 166        | 6.30       | 7                   | 6                        | 162             |
|      | Dynamin-like 120 kDa protein, mitochondrial                                                    | GI:18860831       | 108       | 112        | 8.08       | 4                   | 4                        | 107             |
|      | Cysteinyl-tRNA-Synthetase                                                                      | GI:11191800       | 96        | 95         | 6.32       | 2                   | 3                        | 93              |
|      | Initiation Factor 4B                                                                           | GI:288100         | 69        | 69         | 5.49       | 3                   | 6                        | 73              |
| 81   | Poly(A) binding protein                                                                        | GI:53754          | 71        | 69         | 9.45       | 12                  | 21                       | 420             |
|      | Mitochondrial long-chain enoyl-CoA hydratase/ 3-hydroxycyl-CoA dehydrogenase $\alpha$ -subunit | GI:510108         | 83        | 83         | 9.11       | 3                   | 6                        | 95              |
|      | Elongation factor 2                                                                            | GI:4503483        | 96        | 96         | 6.41       | 2                   | 2                        | 65              |
| 92   | Serum albumin                                                                                  | GI:30794280       | 72        | 69         | 5.82       | 37                  | 53                       | 1791            |
|      | Phosphoenolpyruvate carboxykinase                                                              | GI:38454296       | 70        | 69         | 6.09       | 21                  | 44                       | 1036            |
|      | WD repeat-containing protein 1                                                                 | GI:62078997       | 66        | 67         | 6.15       | 11                  | 23                       | 638             |
|      | Ran-GTPase activating protein                                                                  | GI:349501086      | 64        | 64         | 4.64       | 5                   | 11                       | 191             |
| 101  | Phosphoenolpyruvate carboxykinase                                                              | GI:28454296       | 70        | 69         | 6.09       | 21                  | 44                       | 1036            |
|      | WD repeat-containing protein 1                                                                 | GI:62078997       | 67        | 66         | 6.15       | 11                  | 23                       | 638             |
|      | Ran GTPase-activating protein 1                                                                | GI:349501086      | 64        | 64         | 4.64       | 5                   | 11                       | 191             |
| 112  | hnRNP K isoform 2                                                                              | GI:13384620       | 51        | 51         | 5.31       | 22                  | 33                       | 686             |
| 117  | Carbamoyl-phosphate synthase, mitochondrial                                                    | GI:21361331       | 166       | 166        | 6.33       | 7                   | 6                        | 284             |
|      | T-protein complex 1 subunit $\gamma$                                                           | GI:40018616       | 61        | 61         | 6.23       | 4                   | 7                        | 250             |
|      | Malic enzyme 1                                                                                 | GI:149018984      | 56        | 64         | 5.77       | 4                   | 10                       | 155             |
| 123  | Heat shock protein 6                                                                           | GI:51455          | 61        | 61         | 5.91       | 51                  | 66                       | 2121            |
|      | Chaperonin subunit 8                                                                           | GI:149059760      | 55        | 60         | 5.15       | 13                  | 21                       | 537             |
| 172  | Microsomal epoxide hydrolase                                                                   | GI:205372         | 48        | 53         | 8.62       | 11                  | 25                       | 510             |
|      | 60S ribosomal protein L4                                                                       | GI:11968086       | 48        | 47         | 10.92      | 8                   | 18                       | 354             |
|      | Elongation factor 1 $\alpha$                                                                   | GI:148694454      | 38        | 40         | 9.13       | 4                   | 16                       | 27              |
| 247  | Malate dehydrogenase, cytoplasmic                                                              | GI:15100179       | 37        | 36         | 6.16       | 21                  | 50                       | 9181            |
| 263  | Proteasome subunit, $\alpha$ type 3                                                            | GI:30584117       | 28        | 28         | 5.19       | 7                   | 19                       | 180             |
|      | Mitochondrial 2-oxoglutarate/malate carrier protein                                            | GI:21312994       | 34        | 34         | 9.95       | 2                   | 8                        | 109             |
| 276  | Peroxiredoxin-6                                                                                | GI:16758348       | 25        | 25         | 5.64       | 8                   | 54                       | 630             |
|      | Glutathione S-transferase $\alpha$ -2                                                          | GI:58331251       | 26        | 26         | 8.89       | 3                   | 13                       | 144             |

|     |                                                                          |              |     |     |      |    |    |      |
|-----|--------------------------------------------------------------------------|--------------|-----|-----|------|----|----|------|
|     | PREDICTED: NADH dehydrogenase flavoprotein 2, mitochondrial              | GI:345329641 | 28  | 27  | 8.20 | 2  | 9  | 107  |
|     | Thioredoxin-dependent peroxide reductase, mitochondrial                  | GI:5802974   | 28  | 28  | 7.67 | 1  | 4  | 64   |
| 2   | Carbamoyl-phosphate synthase, mitochondrial                              | GI:8393186   | 166 | 166 | 6.33 | 20 | 13 | 421  |
| 78  | N-ethylmaleimide-sensitive factor                                        | GI:467977    | 84  | 35  | 6.28 | 4  | 5  | 82   |
|     | Protein disulfide-isomerase                                              | GI:16758712  | 73  | 73  | 4.99 | 5  | 10 | 82   |
|     | Non-muscle caldesmon                                                     | GI:227429    | 62  | 61  | 6.36 | 2  | 3  | 69   |
| 95  | Transketolase                                                            | GI:149034221 | 72  | 68  | 7.54 | 11 | 25 | 558  |
|     | Dolichyl-diphosphooligosaccharide-protein glycosyltransferase subunit 1  | GI:132560    | 68  | 69  | 6.05 | 6  | 11 | 273  |
|     | Calcium-binding mitochondrial carrier protein Aralar2                    | GI:392339831 | 75  | 74  | 8.86 | 9  | 11 | 257  |
|     | p68 RNA helicase                                                         | GI:51263     | 70  | 69  | 9.06 | 8  | 14 | 248  |
|     | Gry-rbp/hnRNP K                                                          | GI:3037013   | 70  | 70  | 8.68 | 2  | 4  | 164  |
|     | Very long-chain specific acyl-CoA dehydrogenase, mitochondrial precursor | GI:6978435   | 71  | 70  | 9.01 | 5  | 8  | 134  |
|     | Growth regulated nuclear 68 protein                                      | GI:226021    | 68  |     | 8.95 | 7  | 12 | 244  |
|     | Aralar2                                                                  | GI:6523256   | 75  | 74  | 8.87 | 7  | 8  | 174  |
|     | RNase L inhibitor                                                        | GI:987870    | 69  | 68  | 8.86 | 7  | 12 | 109  |
|     | DEAD (Asp-Glu-Ala-Asp) box polypeptide 17                                | GI:119580652 | 61  | 60  | 7.94 | 4  | 8  | 109  |
|     | 70kDa peroxisomal membrane protein/ABCD3                                 | GI:35553     | 76  | 70  | 9.47 | 1  | 2  | 90   |
|     | Dolichyl-diphosphooligosaccharide-protein glycosyltransferase subunit 1  | GI:4506675   | 69  | 69  | 5.96 | 3  | 3  | 59   |
|     | Ribophorin I                                                             | GI:149036687 | 68  | 69  | 6.05 | 7  | 12 | 283  |
|     | RRM RNA binding protein NSAP1                                            | GI:15986735  | 63  | 66  | 9.27 | 2  | 4  | 164  |
|     | ABC E1                                                                   | GI:157823309 | 68  | 67  | 8.63 | 9  | 15 | 139  |
| 141 | Serine hydroxymethyltransferase, mitochondrial                           | GI:564359582 | 56  | 56  | 8.46 | 32 | 54 | 1488 |
|     | UTP--glucose-1-phosphate uridylyltransferase                             | GI:67078526  | 57  | 57  | 7.18 | 15 | 30 | 516  |
|     | ATP synthase $\alpha$ subunit                                            | GI:203055    | 59  | 59  | 9.22 | 8  | 21 | 385  |
|     | UDP-glucuronosyltransferase 1-1                                          | GI:28849913  | 61  | 61  | 8.77 | 4  | 10 | 114  |
|     | Plasminogen activator inhibitor 1 RNA-binding protein                    | GI:524952264 | 45  | 45  | 8.31 | 8  | 24 | 113  |
|     | UDP-glucuronosyltransferase 1-6                                          | GI:136726    | 61  | 61  | 8.91 | 2  | 6  | 72   |
|     | Serine hydroxymethyltransferase, mitochondrial                           | GI:19923315  | 57  | 57  | 8.76 | 33 | 49 | 1382 |
|     | UTP-glucose-1-phosphate uridylyltransferase isoform a                    | GI:48255966  | 58  | 57  | 8.16 | 17 | 32 | 444  |
|     | ATP synthase subunit a, mitochondrial                                    | GI:4757810   | 48  | 60  | 9.16 | 8  | 21 | 332  |
|     | Polypyrimidine tract-binding protein 1 isoform a                         | GI:4506243   | 60  | 60  | 9.21 | 1  | 4  | 162  |
|     | CGI-55 protein/STARD10                                                   | GI:4929579   | 43  | 43  | 8.42 | 7  | 19 | 99   |

|     |                                                    |              |    |    |      |    |    |     |
|-----|----------------------------------------------------|--------------|----|----|------|----|----|-----|
|     | ATP synthase subunit $\alpha$ , mitochondrial      | GI:6680748   | 60 | 60 | 9.22 | 8  | 21 | 332 |
|     | Pyrimidine binding protein 1                       | GI:57002     | 57 | 57 | 9.14 | 3  | 8  | 186 |
|     | Protein RCC2                                       | GI:507547646 | 57 | 57 | 9.02 | 3  | 7  | 115 |
| 169 | Glutathione synthetase                             | GI:25742757  | 53 | 53 | 5.48 | 17 | 34 | 804 |
|     | Eukaryotic peptide chain release factor subunit 1  | GI:4759034   | 49 | 49 | 5.51 | 10 | 20 | 175 |
|     | Phenylalanine-4-hydroxylase                        | GI:4557819   | 52 | 52 | 6.15 | 3  | 5  | 105 |
|     | Glutathione synthetase                             | GI:4504169   | 53 | 53 | 5.67 | 7  | 10 | 346 |
| 188 | PREDICTED: $\gamma$ -enolase isoform 2             | GI:472389324 | 43 | 47 | 5.04 | 10 | 39 | 377 |
| 201 | Phenylalanine-4-hydroxylase                        | GI:129975    | 52 | 52 | 5.76 | 19 | 44 | 835 |
|     | Mitochondrial-processing peptidase subunit $\beta$ | GI:122065519 | 55 | 54 | 6.25 | 14 | 22 | 623 |
|     | Palmitoylated Serine/Threonine kinase              | GI:4106342   | 35 | 34 | 6.05 | 3  | 10 | 138 |
| 202 | Cytochrome b-c1 complex subunit 1, mitochondrial   | GI:51948476  | 54 | 53 | 5.57 | 7  | 15 | 208 |
|     | Glutathione synthetase isoform a                   | GI:6680117   | 52 | 52 | 5.56 | 2  | 6  | 59  |
|     | $\gamma$ -actin                                    | GI:809561    | 41 | 42 | 5.56 | 11 | 23 | 394 |
|     | $\beta$ -actin variant                             | GI:62897625  | 42 | 42 | 5.37 | 11 | 23 | 397 |
| 216 | Ferrochelatase mitochondrial                       | GI:564393790 | 52 | 48 | 9.18 | 10 | 17 | 205 |
|     | RNA binding protein p45AUF1                        | GI:9588096   | 38 | 38 | 7.62 | 6  | 18 | 107 |
|     | DNA-binding protein                                | GI:181914    | 36 | 36 | 8.86 | 4  | 13 | 47  |
| 236 | Phosphotriesterase-related protein                 | GI:61889077  | 40 | 39 | 6.40 | 11 | 36 | 620 |
|     | Ubiquitin fusion-degradation 1 like protein        | GI:1654346   | 39 | 39 | 6.04 | 3  | 11 | 121 |
|     | N-acetylneuraminic acid synthase                   | GI:149045843 | 32 | 40 | 6.34 | 2  | 11 | 80  |
| 239 | Aflatoxin B1 aldehyde reductase member 2           | GI:19705537  | 38 | 40 | 6.27 | 16 | 37 | 458 |
|     | Aflatoxin aldehyde reductase                       | GI:2736256   | 37 | 40 | 6.23 | 9  | 21 | 210 |
|     | Serine dehydratase-like                            | GI:157820447 | 36 | 35 | 6.12 | 4  | 13 | 115 |
| 241 | CGI-52 protein/STARD10                             | GI:4929573   | 41 | 33 | 8.54 | 10 | 29 | 551 |
|     | Transaldolase                                      | GI:12002054  | 38 | 37 | 6.57 | 10 | 23 | 457 |
|     | LIM and SH3 domain protein 1                       | GI:14249130  | 30 | 30 | 6.61 | 6  | 27 | 341 |
|     | 60S acidic ribosomal protein P0                    | GI:11693176  | 34 | 34 | 5.91 | 6  | 27 | 294 |
| 243 | Aflatoxin B1 aldehyde reductase member 2           | GI:19705537  | 38 | 41 | 6.27 | 23 | 53 | 881 |
|     | Aldose 1-epimerase                                 | GI:56090564  | 38 | 38 | 6.18 | 6  | 23 | 256 |
|     | Farnesyl pyrophosphate synthase                    | GI:120478    | 41 | 48 | 5.29 | 1  | 4  | 100 |
| 266 | Enoyl-Coa Hydratase, mitochondrial                 | GI: 17530977 | 32 | 32 | 8.39 | 3  | 16 | 103 |
|     | Phosphoglycerate mutase 1                          | GI:4505753   | 29 | 29 | 6.67 | 13 | 46 | 329 |

The isoelectric points, molecular weights, accession numbers and Mascot scores for each protein identified by mass spectrometry are listed. The upper half of the table includes those proteins with decreased immunoreactivity (possible STK16 substrates) while the bottom lists the proteins with enhanced immunoreactivity (possible reciprocal regulators).

**TABLE S2.** General functions of proteins with decreased phospho-immunoreactivity

| <b>Protein</b>                                                               | <b>General Function</b>                          | <b>Subcellular Location</b> | <b>Phospho-protein?</b> | <b>Refs.</b>    |
|------------------------------------------------------------------------------|--------------------------------------------------|-----------------------------|-------------------------|-----------------|
| 60S ribosomal protein L4                                                     | Protein translation                              | cyt                         | ser                     | [1, 2]          |
| Cysteinal-tRNA-synthetase                                                    | Protein translation                              | cyt                         | ser                     | [3, 4]          |
| Elongation factor 1 $\alpha$                                                 | Protein translation                              | cyt                         | thr                     | [5, 6]          |
| Elongation factor 2                                                          | Protein translation                              | cyt                         | ser/thr                 | [6]             |
| Initiation factor 4B                                                         | Protein translation                              | cyt                         | ser/thr                 | [2, 4, 7]       |
| Poly(A) binding protein                                                      | Protein translation                              | cyt                         | ser                     | [4, 8]          |
| Serum albumin precursor                                                      | Blood pressure regulation<br>(secretory protein) | ER/Golgi                    |                         |                 |
| Chaperonin subunit 8                                                         | Molecular chaperone                              | cyt                         |                         |                 |
| Heat shock protein 65                                                        | Molecular chaperone                              | mito                        | ser                     |                 |
| T-protein complex 1 subunit $\gamma$                                         | Molecular chaperone                              | cyt                         | ser                     | [3, 7, 9]       |
| Endoplasmic reticulum protein OS-9                                           | ER chaperone/ERAD                                | ER                          | ser/thr                 | [2, 3, 7]       |
| Proteasome subunit, $\alpha$ type 3                                          | Protein degradation                              | ER                          |                         |                 |
| Glutathione S-transferase $\alpha$ -2                                        | Oxidative stress                                 | cyt                         | ser                     | [2-4, 9-11]     |
| Peroxiredoxin-6                                                              | Oxidative stress                                 | cyt                         |                         |                 |
| Thioredoxin-dependent peroxide reductase                                     | Oxidative stress                                 | cyt/lys                     | thr                     | [2, 4]          |
| Microsomal epoxide hydrolase                                                 | Detoxification                                   | mito                        | thr                     | [1, 2]          |
| $\gamma$ -enolase isoform 2                                                  | Carbohydrate metabolism                          | ER                          |                         |                 |
| Malate dehydrogenase                                                         | Carbohydrate metabolism                          | cyt                         | ser/thr                 | [2]             |
| Mitochondrial 2 oxoglutarate-malate carrier protein                          | Carbohydrate metabolism                          | cyt                         | ser                     | [2, 3]          |
| PEP carboxykinase                                                            | Carbohydrate metabolism                          | mito                        |                         |                 |
| NADH dehydrogenase flavoprotein 2                                            | Carbohydrate metabolism                          | cyt                         | ser/thr                 | [3]             |
| Mitochondrial long-chain enoyl-CoA hydratase/3-hydroxyacyl-CoA dehydrogenase | Electron transport                               | mito                        |                         |                 |
| Vigilin A (HDL binding protein)                                              | Lipid metabolism                                 | mito                        | ser/thr                 | [3]             |
| Carbamoyl-phosphate synthase                                                 | Sterol metabolism                                | cyt                         | ser/thr                 | [2-4, 7, 9, 12] |
| WD repeat-containing protein-1                                               | AA metabolism; urea cycle                        | mito                        | ser                     | [3]             |
| Ran-GAP                                                                      | Actin dynamics                                   | cyt                         |                         |                 |
| Dynammin-like 120 kDa protein                                                | Nuclear transport                                | cyt/nuc                     | ser/thr                 | [13]            |
|                                                                              | Mitochondrial fusion                             | mito                        |                         |                 |

The identified proteins with decreased phospho-serine/threonine immunoreactivity are grouped according to function. The subcellular location of each protein is indicated. Known serine- or threonine-phospho-proteins are also indicated and the references are provided. cyt, cytosol; mito, mitochondria; nuc, nucleus; Refs., references cited

**TABLE S3.** General functions of proteins with increased phospho-immunoreactivity.

| <b>Protein</b>                                                                              | <b>General Function</b>         | <b>Subcellular Location</b> | <b>Phospho-protein?</b> | <b>Refs.</b>  |
|---------------------------------------------------------------------------------------------|---------------------------------|-----------------------------|-------------------------|---------------|
| p68 RNA helicase                                                                            | Transcriptional regulation      | nuc                         | ser                     | [2, 7]        |
| DEAD (Asp-Glu-Ala-Asp) box polypeptide                                                      | Transcriptional regulation      | nuc                         |                         |               |
| RNA binding protein p45AUF1                                                                 | Transcriptional regulation      | nuc                         |                         |               |
| Pyrimidine binding protein 1                                                                | Transcriptional regulation      | cyt                         | ser/thr                 | [2, 4, 7, 14] |
| 60S acidic ribosomal protein P0 Eukaryotic peptide chain release factor subunit 1 isoform 1 | Protein translation             | cyt/nuc                     | ser                     | [12]          |
| Protein with homology to EIF-4A                                                             | Protein translation             | cyt/nuc                     | ser                     | [2, 4, 9]     |
| Ferrochelatase                                                                              | Porphyrin synthesis             | mito                        |                         |               |
| Ribophorin I                                                                                | Glycoprotein processing         | ER                          |                         |               |
| Protein disulfide-isomerase A4                                                              | ER protein chaperone            | ER                          |                         |               |
| Ubiquitin fusion-degradation 1 like protein                                                 | Protein degradation             | cyt                         | ser                     | [2, 4, 7, 9]  |
| Glutathione synthetase                                                                      | Oxidative stress                | cyt                         | ser                     | [3]           |
| Aflatoxin B1 aldehyde reductase2                                                            | Detoxification                  | cyt                         | ser                     | [3]           |
| UDP-glucuronosyltransferase 1-6                                                             | Detoxification                  | ER                          |                         |               |
| Aldose 1-epimerase                                                                          | Carbohydrate metabolism         | cyt                         |                         |               |
| N-acetylneuraminic acid synthase                                                            | Carbohydrate metabolism         | cyt                         |                         |               |
| Citrate synthase                                                                            | Carbohydrate metabolism         | mito                        |                         |               |
| Phosphoglycerate mutase 1                                                                   | Carbohydrate metabolism         | cyt                         | ser                     | [2-4, 7, 9]   |
| Phosphotriesterase-related protein                                                          | Carbohydrate metabolism         | cyt                         |                         |               |
| Transaldolase                                                                               | Carbohydrate metabolism         | cyt                         | ser                     | [3]           |
| Transketolase                                                                               | Carbohydrate metabolism         | cyt                         | ser/thr                 | [2, 4, 9]     |
| UTP-glucose-1-phosphate uridylyltransferase                                                 | Carbohydrate metabolism         | cyt                         | ser/thr                 | [2, 3, 7]     |
| ATP synthase $\alpha$ subunit                                                               | Cellular respiration            | mito                        | ser                     | [3, 7]        |
| Cytochrome b-c1 complex subunit 1                                                           | Cellular respiration            | mito                        |                         |               |
| 70kDa peroxisomal membrane protein/ABCD3                                                    | Lipid metabolism (BA synthesis) |                             |                         |               |

|                                                       |                                 |         |         |                  |
|-------------------------------------------------------|---------------------------------|---------|---------|------------------|
| Enoyl-Coa Hydratase                                   | Lipid metabolism                | mito    | ser/thr | [3]              |
| Farnesyl pyrophosphate synthase                       | Lipid metabolism                | cyt     |         |                  |
| Very long-chain specific acyl-CoA dehydrogenase       | Lipid metabolism                | mito    |         |                  |
| CGI-52 protein/STARD10                                | Phospholipid transfer           | cyt     | ser     | [3, 15]          |
| Calcium-binding mitochondrial carrier protein Aralar2 | AA metabolism                   | mito    |         |                  |
| Phenylalanine-4-hydroxylase                           | AA metabolism                   | cyt     | ser     | [3, 16]          |
| Serine hydroxymethyltransferase                       | AA metabolism                   | cyt     |         |                  |
| $\gamma$ -actin                                       | Actin cytoskeleton              | cyt     |         |                  |
| $\beta$ -actin variant                                | Actin cytoskeleton              | cyt     |         |                  |
| Caldesmon                                             | Actin dynamics                  | cyt     | ser     | [2-4, 7, 8, 14]  |
| LIM and SH3 domain protein 1                          | Actin dynamics                  | cyt     | ser/thr | [2-4, 9, 14, 17] |
| Protein RCC2                                          | Mitosis/rac GEF (?)             | cyt     | ser/thr | [4, 8, 9]        |
| Mitochondrial-processing peptidase                    | Mitochondrial protein targeting | mito    |         |                  |
| STK16                                                 | Constitutive secretion          | cyt/nuc | ser/thr | [18]             |
| NEM sensitive factor                                  | Vesicle docking & fusion        | cyt     |         |                  |

The identified proteins with increased phospho-serine/threonine immunoreactivity are grouped according to function. The subcellular location of each protein is indicated. Known serine- or threonine-phosphoproteins are also indicated and references are cited. BA, bile acid; cyto, cytosol; mito, mitochondria; NEM, N-ethylmaleimide; nuc, nucleus; Refs., references cited

## REFERENCES

- 1 Daub, H., Olsen, J. V., Bairlein, M., Gnad, F., Oppermann, F. S., Korner, R., Greff, Z., Keri, G., Stemmann, O. and Mann, M. (2008) Kinase-selective enrichment enables quantitative phosphoproteomics of the kinome across the cell cycle. *Mol Cell*. **31**, 438-448
- 2 Olsen, J. V., Vermeulen, M., Santamaria, A., Kumar, C., Miller, M. L., Jensen, L. J., Gnad, F., Cox, J., Jensen, T. S., Nigg, E. A., Brunak, S. and Mann, M. (2010) Quantitative phosphoproteomics reveals widespread full phosphorylation site occupancy during mitosis. *Sci Signal*. **3**, ra3
- 3 Bian, Y., Song, C., Cheng, K., Dong, M., Wang, F., Huang, J., Sun, D., Wang, L., Ye, M. and Zou, H. (2013) An enzyme assisted RP-RPLC approach for in-depth analysis of human liver phosphoproteome. *J Proteomics*. **96**, 253-262
- 4 Dephoure, N., Zhou, C., Villen, J., Beausoleil, S. A., Bakalarski, C. E., Elledge, S. J. and Gygi, S. P. (2008) A quantitative atlas of mitotic phosphorylation. *Proc Natl Acad Sci U S A*. **105**, 10762-10767
- 5 Eckhardt, K., Troger, J., Reissmann, J., Katschinski, D. M., Wagner, K. F., Stengel, P., Paasch, U., Hunziker, P., Bortner, E., Barth, S., Schlafli, P., Spielmann, P., Stiehl, D. P., Camenisch, G. and Wenger, R. H. (2007) Male germ cell expression of the PAS domain kinase PASKIN and its novel target eukaryotic translation elongation factor eEF1A1. *Cell Physiol Biochem*. **20**, 227-240



- 6 Hizli, A. A., Chi, Y., Swanger, J., Carter, J. H., Liao, Y., Welcker, M., Ryazanov, A. G. and Clurman, B. E. (2012) Phosphorylation of eukaryotic elongation factor 2 (eEF2) by cyclin A-cyclin-dependent kinase 2 regulates its inhibition by eEF2 kinase. *Mol Cell Biol.* **33**, 596-604
- 7 Rigbolt, K. T., Prokhorova, T. A., Akimov, V., Henningsen, J., Johansen, P. T., Kratchmarova, I., Kassem, M., Mann, M., Olsen, J. V. and Blagoev, B. (2011) System-wide temporal characterization of the proteome and phosphoproteome of human embryonic stem cell differentiation. *Sci Signal.* **4**, rs3
- 8 Olsen, J. V., Blagoev, B., Gnad, F., Macek, B., Kumar, C., Mortensen, P. and Mann, M. (2006) Global, in vivo, and site-specific phosphorylation dynamics in signaling networks. *Cell.* **127**, 635-648
- 9 Mayya, V., Lundgren, D. H., Hwang, S. I., Rezaul, K., Wu, L., Eng, J. K., Rodionov, V. and Han, D. K. (2009) Quantitative phosphoproteomic analysis of T cell receptor signaling reveals system-wide modulation of protein-protein interactions. *Sci Signal.* **2**, ra46
- 10 Han, G., Ye, M., Zhou, H., Jiang, X., Feng, S., Tian, R., Wan, D., Zou, H. and Gu, J. (2008) Large-scale phosphoproteome analysis of human liver tissue by enrichment and fractionation of phosphopeptides with strong anion exchange chromatography. *Proteomics.* **8**, 1346-1361
- 11 Wang, X., Chen, C. F., Baker, P. R., Chen, P. L., Kaiser, P. and Huang, L. (2007) Mass spectrometric characterization of the affinity-purified human 26S proteasome complex. *Biochemistry.* **46**, 3553-3565
- 12 Oppermann, F. S., Gnad, F., Olsen, J. V., Hornberger, R., Greff, Z., Keri, G., Mann, M. and Daub, H. (2009) Large-scale proteomics analysis of the human kinome. *Mol Cell Proteomics.* **8**, 1751-1764
- 13 Zhai, B., Villen, J., Beausoleil, S. A., Mintseris, J. and Gygi, S. P. (2008) Phosphoproteome analysis of *Drosophila melanogaster* embryos. *J Proteome Res.* **7**, 1675-1682
- 14 Yu, L. R., Zhu, Z., Chan, K. C., Issaq, H. J., Dimitrov, D. S. and Veenstra, T. D. (2007) Improved titanium dioxide enrichment of phosphopeptides from HeLa cells and high confident phosphopeptide identification by cross-validation of MS/MS and MS/MS/MS spectra. *J Proteome Res.* **6**, 4150-4162
- 15 Olayioye, M. A., Buchholz, M., Schmid, S., Schoffler, P., Hoffmann, P. and Pomorski, T. (2007) Phosphorylation of StarD10 on serine 284 by casein kinase II modulates its lipid transfer activity. *J Biol Chem.* **282**, 22492-22498
- 16 Miranda, F. F., Teigen, K., Thorolfsson, M., Svebak, R. M., Knappskog, P. M., Flatmark, T. and Martinez, A. (2002) Phosphorylation and mutations of Ser(16) in human phenylalanine hydroxylase. Kinetic and structural effects. *J Biol Chem.* **277**, 40937-40943
- 17 Zahedi, R. P., Lewandrowski, U., Wiesner, J., Wortelkamp, S., Moebius, J., Schutz, C., Walter, U., Gambaryan, S. and Sickmann, A. (2008) Phosphoproteome of resting human platelets. *J Proteome Res.* **7**, 526-534
- 18 Eswaran, J., Bernad, A., Ligos, J. M., Guinea, B., Debreczeni, J. E., Sobott, F., Parker, S. A., Najmanovich, R., Turk, B. E. and Knapp, S. (2008) Structure of the human protein kinase MPSK1 reveals an atypical activation loop architecture. *Structure.* **16**, 115-124

## Full length Gels and Blots

- The 1D immunoblots shown in Figures 1B and 2B are full-length.
- The 2D CBB-blue stained gels shown in Figure 2C are full-length and the 2D immunoblots shown in Figures 2C, 3A and 3B are also all full-length.
- The cropped immunoblots shown in Figure 3C are from the immunoblots shown in Figure 2C.
- The full-length immunoblots that were cropped for the figures are provided below. The cropped regions are indicated with red boxes and brief legends are provided.

**Figure 1A**

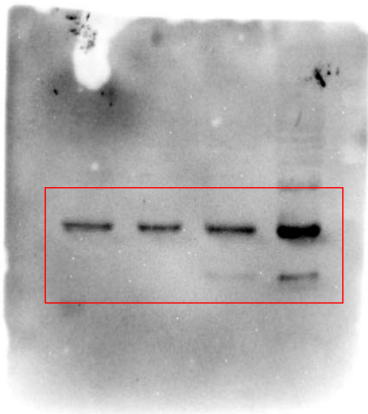

**Top panel:**

IB: anti-V5 (to detect tagged STk16)  
STK16 WT  $\pm$  lac/E202A right  $\pm$  lac

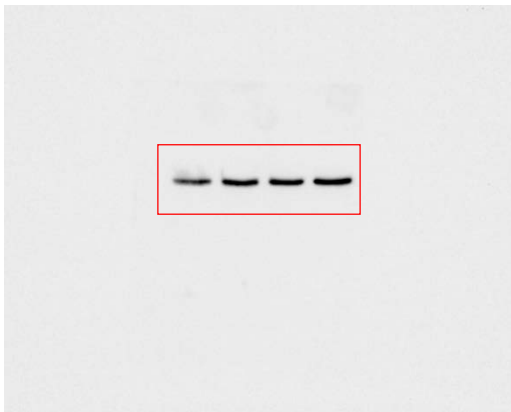

**Bottom panel:**

IB: anti- $\alpha$ -tubulin  
STK16 WT  $\pm$  lac/E202A right  $\pm$  lac  
(different blot with the same samples from above)

**Figure 2A**

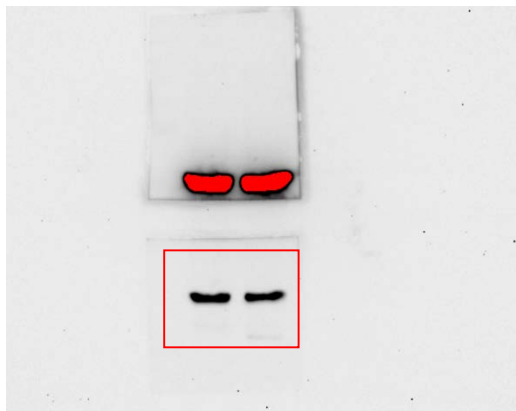

**Top panel:**

IB: anti-V5 (to detect tagged STK16)

WCE from cells expressing STK16 WT/E202A

**Bottom panel:**

IB: anti- $\alpha$ -tubulin

WCE from cells expressing STK16 WT/E202A

(different blot with the same samples from above)

**Figure 4B**

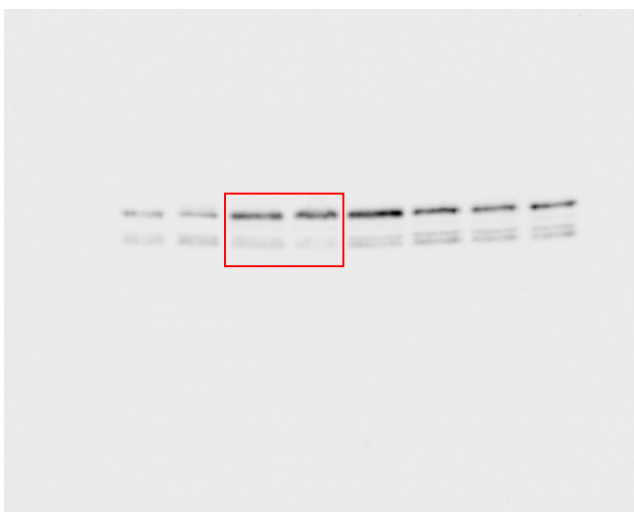

IB: WDR1

WCE from cells expressing STK16 WT/E202A

**Figure 4B**

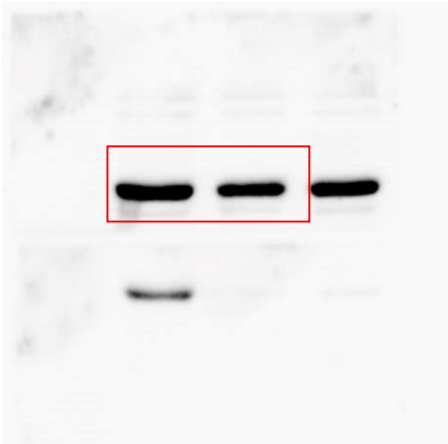

IB: tubulin  
WCE from cells expressing STK16 WT/E202A

**Figure 4D**

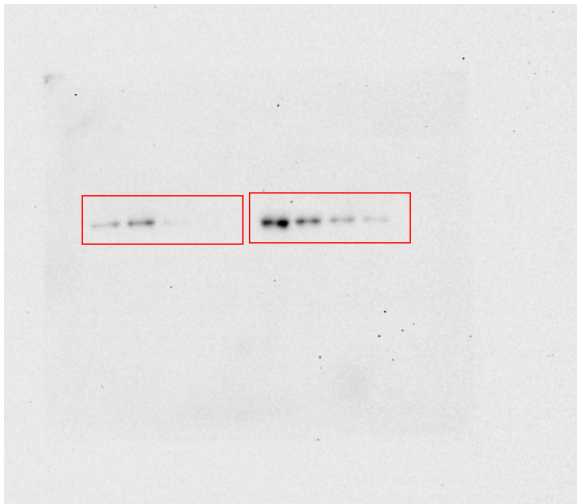

IB: anti-WDR1  
Elutions 1 - 4 from control on left  
(top panel in figure)  
Elutions 1 - 4 from OA-treated cells on right  
(bottom panel in figure)

**Figure 4E**

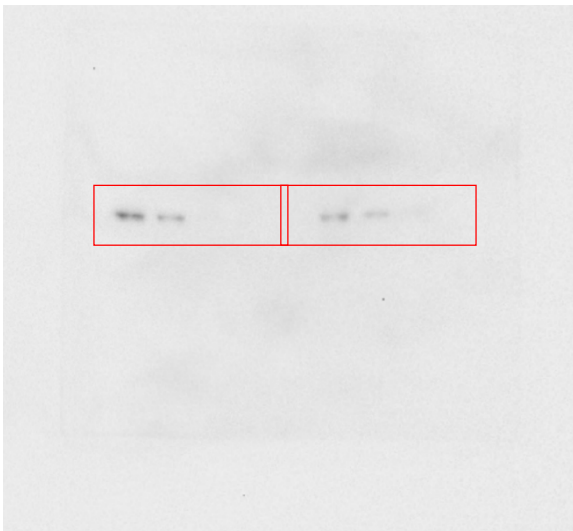

IB: anti-WDR1  
Elutions 1 - 4 from WT expressing cells on left  
(top panel in figure)  
Elutions 1 - 4 from E202A expressing cells on right  
(bottom panel in figure)

**Figure 5C**

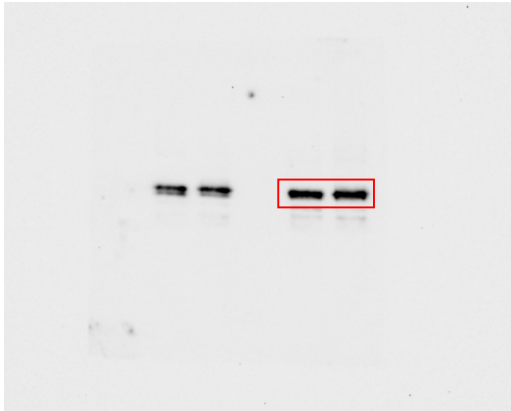

IB: anti-WDR1  
WCE from control cells/OA-treated cells

**Figure 5C**

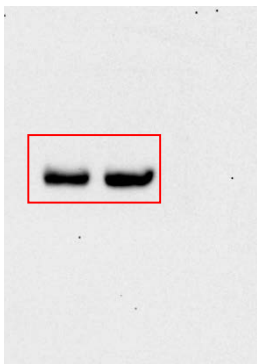

IB: anti-tubulin  
WCE from control cells/OA-treated cells

**Figure 6D top panels (short)**

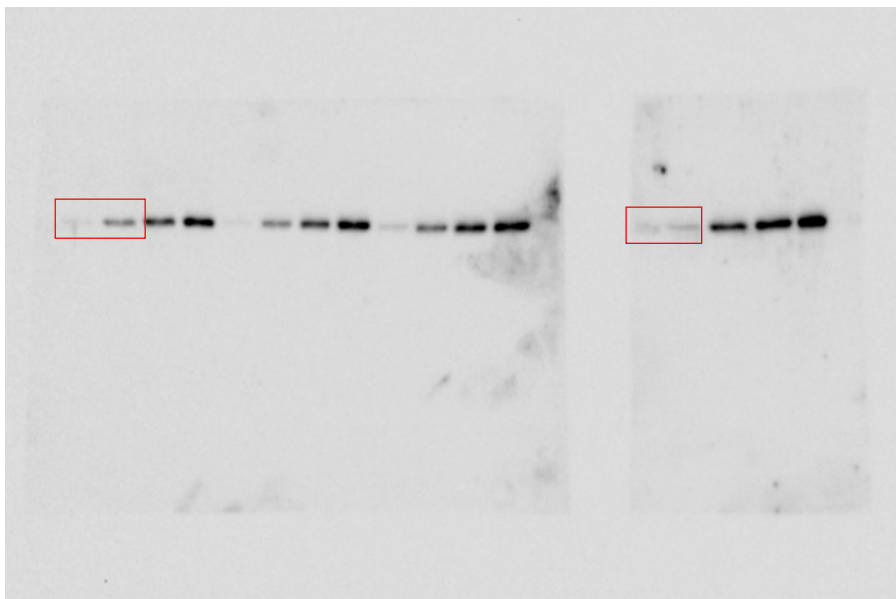

IB: anti-albumin  
Secretion assay  
0 and 15 min time points  
From control on left (bottom left panel in figure)  
From cells treated with "short" lat B on right (bottom left panel in figure)

### Figure 6D bottom panels (long)

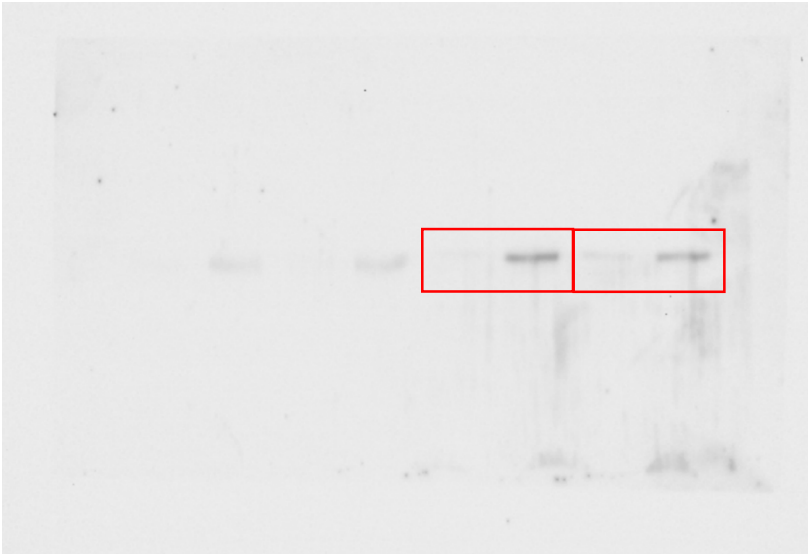

IB: anti-albumin

Secretion assay

0 and 15 min time points

From control on left bottom right panel in figure)

From cells treated with "long" lat B on right (bottom right panel in figure)

### Figure 6D top panels (short)

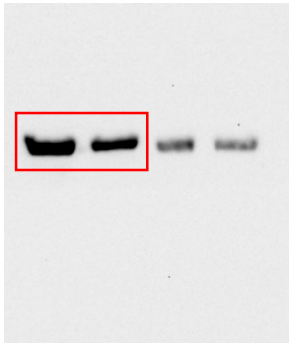

IB: anti-tubulin

Secretion assay

Whole cell lysates from control on left or "short" lat B on right (top left panel in figure)

### Figure 6D top panels (long)

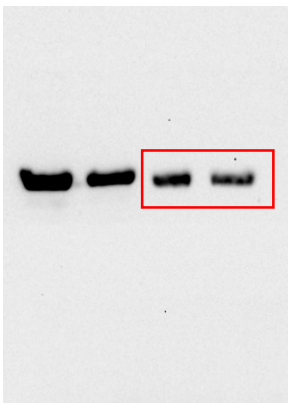

IB: anti-tubulin

Secretion assay

Whole cell lysates from control on left or "long" lat B on right (top right panel in figure)

**Figure 7B**

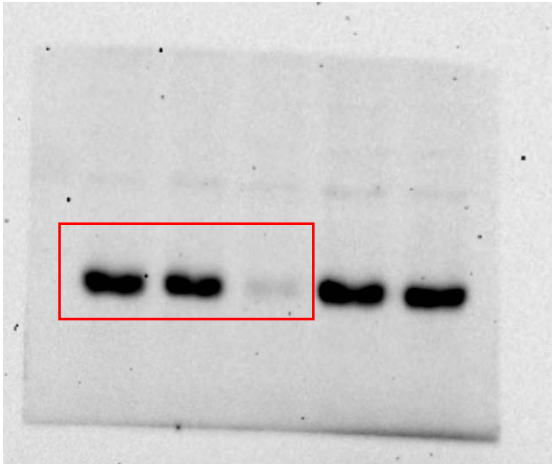

**Top Panel:**

IB: anti-WDR1

Cells treated with con, scrambled or WDR1 siRNA

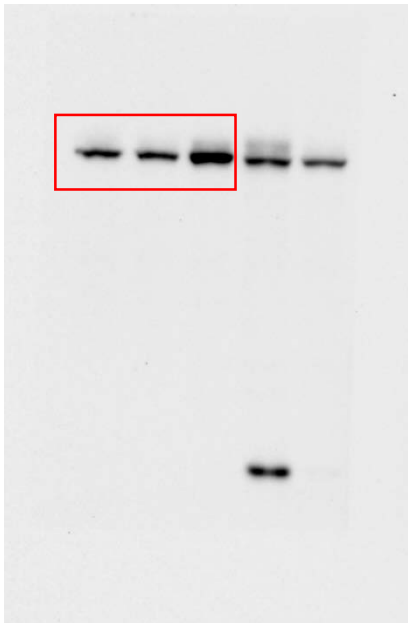

**Middle panel:**

IB: anti-V5 (to detect sDPPIV)

Cells treated with con, scrambled or WDR1 siRNA  
(same samples as above)

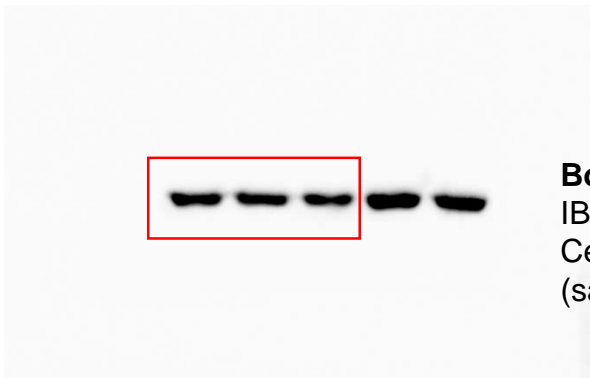

**Bottom panel:**

IB: anti- $\alpha$ -tubulin

Cells treated with con, scrambled or WDR1 siRNA  
(same samples as above)

## Figure 7B

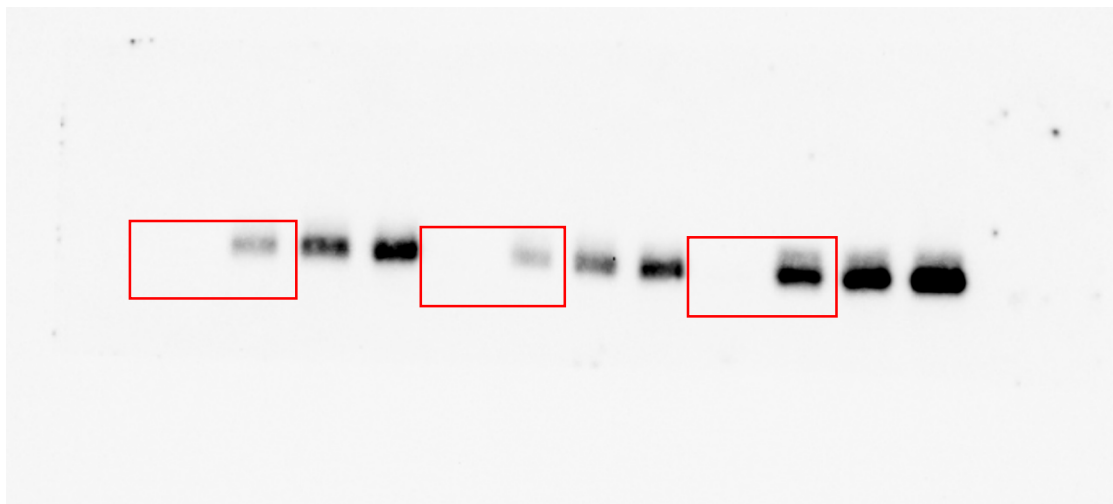

IB: anti-V5 (to detect sDPPIV)

Secretion Assay

0 and 60 min time points

From control (untransfected) cells on left (top panel in figure)

Treated with scrambled siRNA in middle (middle panel in figure)

Treated with WDR1 siRNA on right (bottom panel in figure)
